# Supplementary material
Source: PubMed Central journal article supplement (PMC5801368)
Supplement: ajtr0010-0304-f5.pdf [file ajtr0010-0304-f5.pdf]

## CD133 promotes chemoresistance through PI3K-p85 interaction

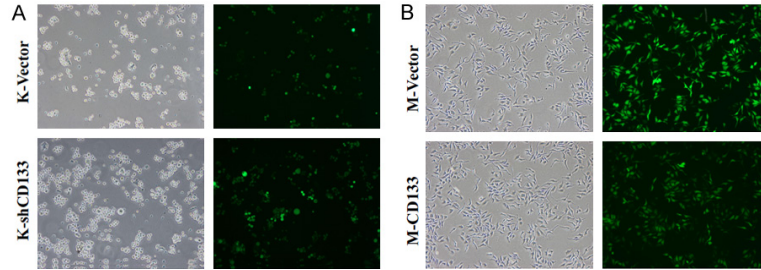

**Figure S1.** A, B. Expression of green fluorescent protein in the newly constructed CD133 knockdown and overexpressing cell lines by lentivirus infection.

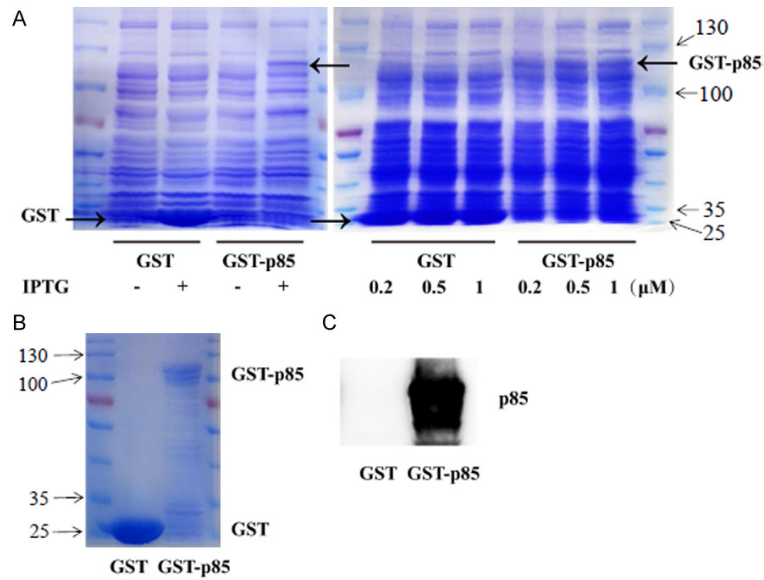

**Figure S2.** A. The design, induction and identification of GST-p85 prokaryotic expression vector; B. The purification and verification of GST-p85 protein by GST beads and coomassie blue staining; C. The protein expression of GST-p85 by western blot.

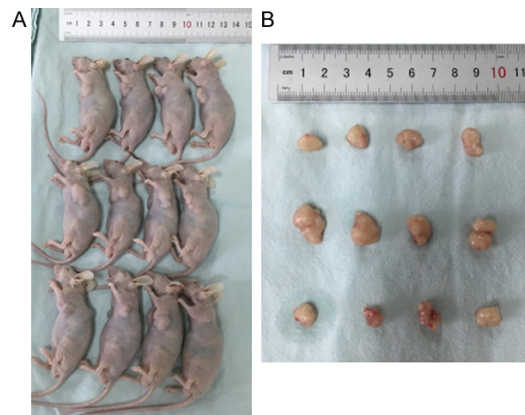

**Figure S3.** A, B. Tumor volume and weight in the control, wide type and mutant 852 groups after 4 weeks.
